# Supplementary material for: Cooperation between geriatricians and general practitioners for improved pharmacotherapy in home-dwelling elderly people receiving polypharmacy – the COOP Study: study protocol for a cluster randomised controlled trial
Source: Springer Nature journal article supplement (doi:10.1186/s13063-017-1900-0), 2017-04-04
Supplement: MOESM2 [file 12196420]

|                            | STUDY PERIOD |            |                 |          |           |
|----------------------------|--------------|------------|-----------------|----------|-----------|
|                            | Enrolment    | Allocation | Post-allocation |          | Close-out |
| TIMEPOINT                  | $-t_1$       | 0          | Intervention    | 16 weeks | 24 weeks  |
| <b>ENROLMENT:</b>          |              |            |                 |          |           |
| Eligibility screen         | X            |            |                 |          |           |
| Informed consent           | X            |            |                 |          |           |
| Allocation                 |              | X          |                 |          |           |
| <b>INTERVENTIONS:</b>      |              |            |                 |          |           |
| Intervention group         |              |            | X               |          |           |
| Control group              |              |            |                 |          |           |
| <b>ASSESSMENTS:</b>        |              |            |                 |          |           |
| Background variables       |              | X          |                 |          |           |
| Primary outcome measure    |              | X          |                 | X        | X         |
| Secondary outcome measures |              | X          |                 | X        | X         |
